# Supplementary material for: NAC-Like Gene GIBBERELLIN SUPPRESSING FACTOR Regulates the Gibberellin Metabolic Pathway in Response to Cold and Drought Stresses in Arabidopsis
Source: PubMed Central journal article supplement (PMC6917810; doi:10.1038/s41598-019-55429-8), 2019-12-17
Supplement: 41598_2019_55429_MOESM1_ESM.pdf [file 41598_2019_55429_MOESM1_ESM.pdf]

**NAC-Like Gene *GIBBERELLIN SUPPRESSING FACTOR* Regulates the Gibberellin Metabolic Pathway in Response to Cold and Drought Stresses in *Arabidopsis***

Hong-le Chen<sup>1</sup>, Pei-Fang Li<sup>1</sup> and Chang-Hsien Yang<sup>1,2\*</sup>

<sup>1</sup>Institute of Biotechnology,

<sup>2</sup>Advanced Plant Biotechnology Center,

National Chung Hsing University,

Taichung, Taiwan 40227 ROC

\* To whom correspondence should be addressed

E-mail: [chyang@dragon.nchu.edu.tw](mailto:chyang@dragon.nchu.edu.tw)

**A**

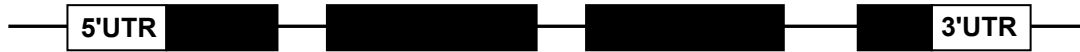

**B**

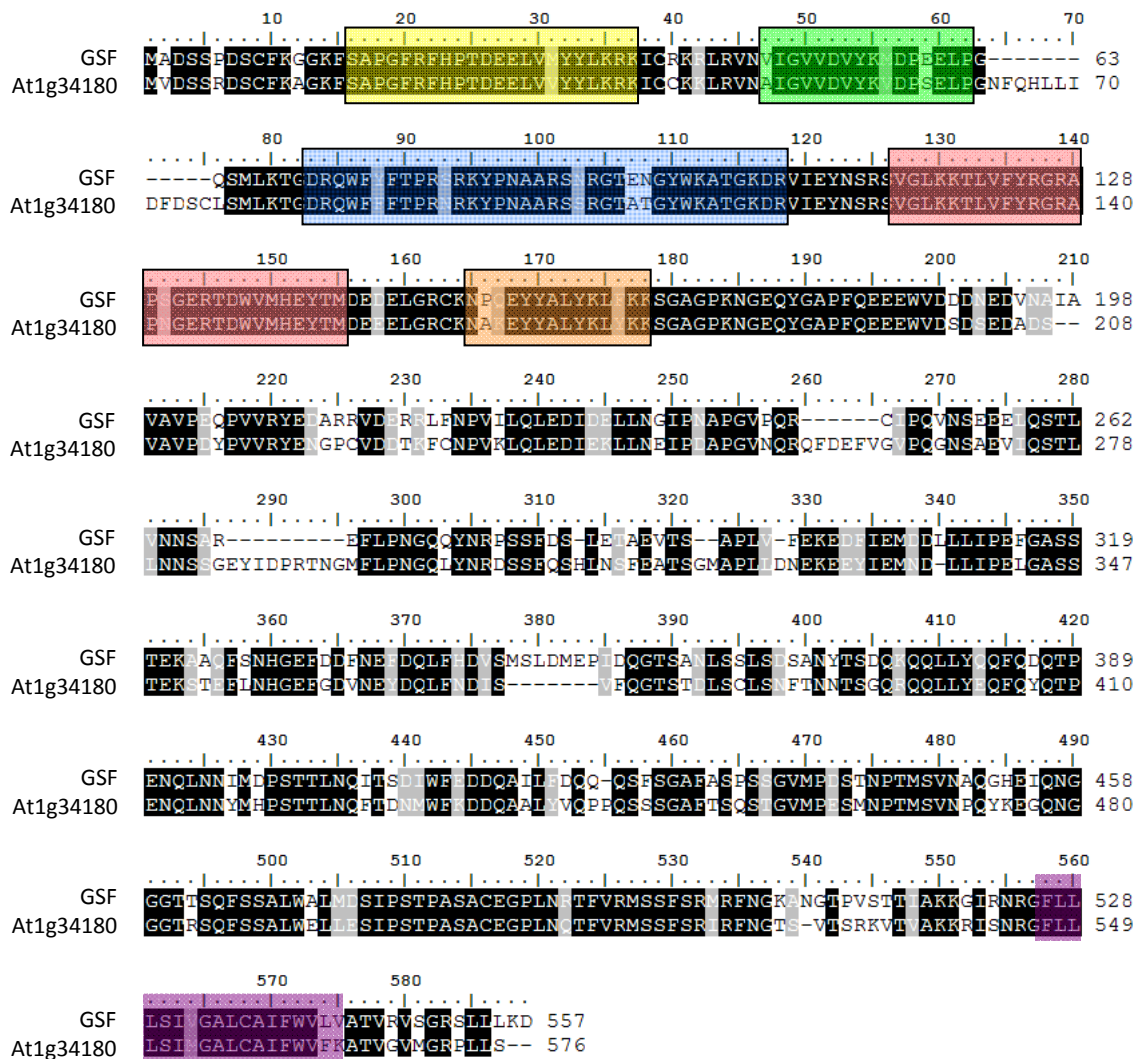

**Supplementary Figure S1.** Gene structure and protein sequence of *Arabidopsis GSF*.

**(A)** Schematic diagram for the *GSF* gene, which contains 3 introns (line) and 4 exons (black boxes). 5'UTR and 3'UTP indicates the 3' and 5' untranslated regions, respectively.

**(B)** Protein sequence comparison of GSF (At1g34190) and the most closely related *Arabidopsis* NAC-like protein At1g34180. The GSF protein contains a putative conserved NAC domain in the N terminal that consists of five subdomains (A-E; A: yellow box, B: green box, C: blue box, D: red box, E: orange box). In the C terminus, one transmembrane motif is indicated in the purple box. In each alignment, identical or similar amino acid residues are indicated by black or gray boxes, respectively. Dashes were introduced to improve alignment. This sequence alignment was generated using the Clustal W-Multiple Sequence Alignment Program at the Biology Work Bench (<http://workbench.sdsc.edu>).

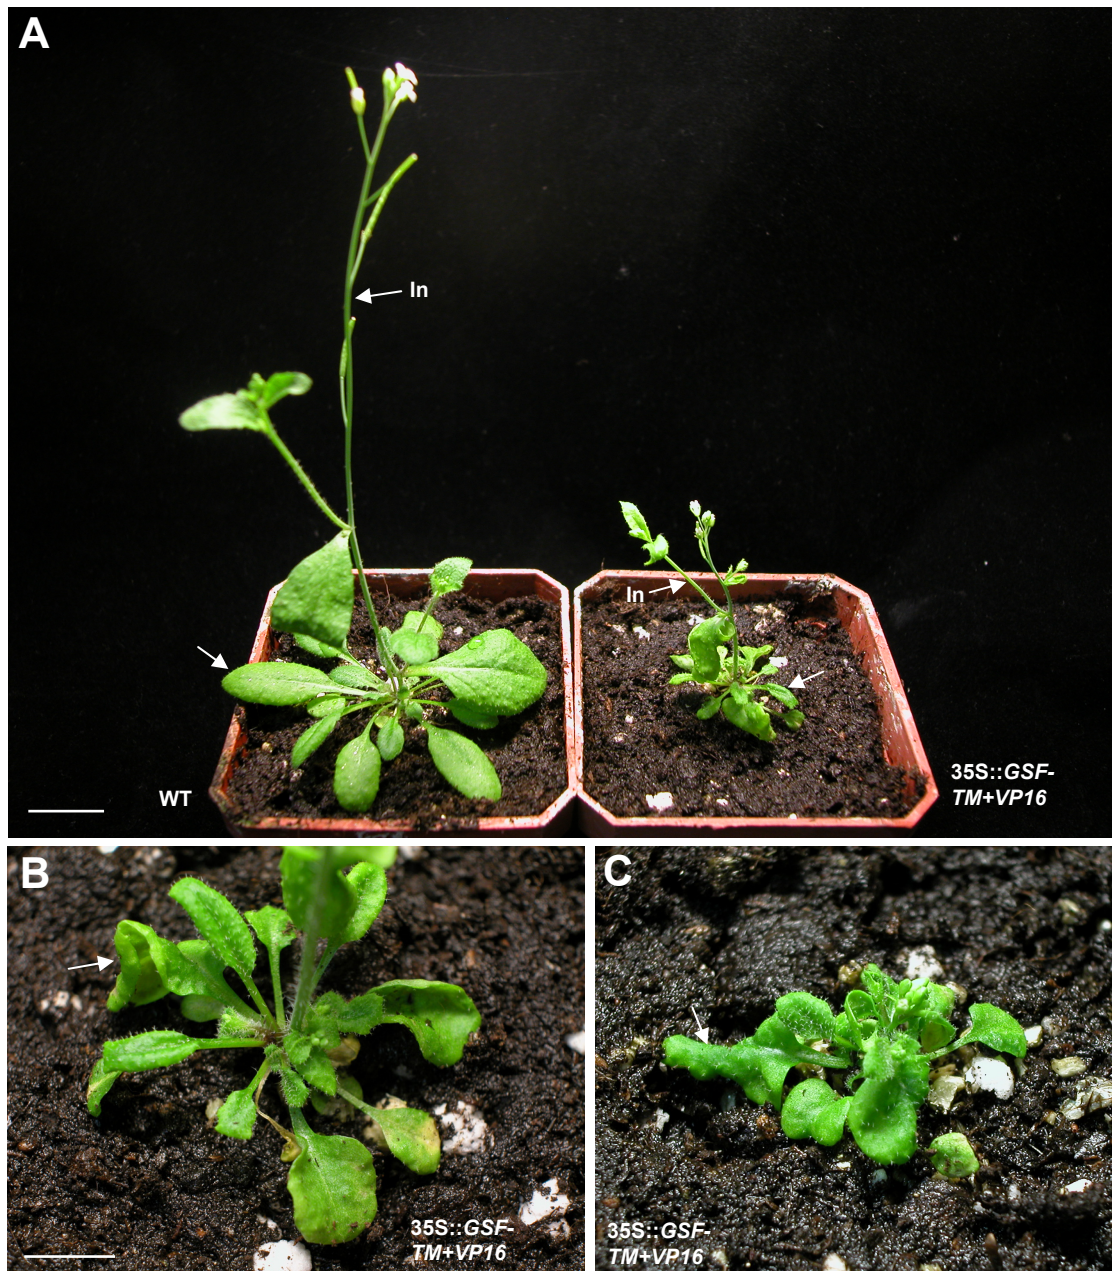

**Supplementary Figure S2.** Phenotypic analysis of the *35S::GSF-TM+VP16 Arabidopsis* plants.

**(A)** A 32-day-old *35S::GSF-TM+VP16* plant (right) showed a severe dwarfism phenotype with small compact leaves (arrow) and short inflorescence (In), while wild-type plants (WT, left) produced normal rosette leaves (arrow) and well-elongated inflorescence (In). Bar = 15mm

**(B-C)** Close-up of two *35S::GSF-TM+VP16* plants with small compact and curled leaves (arrow). Bar = 5 mm.



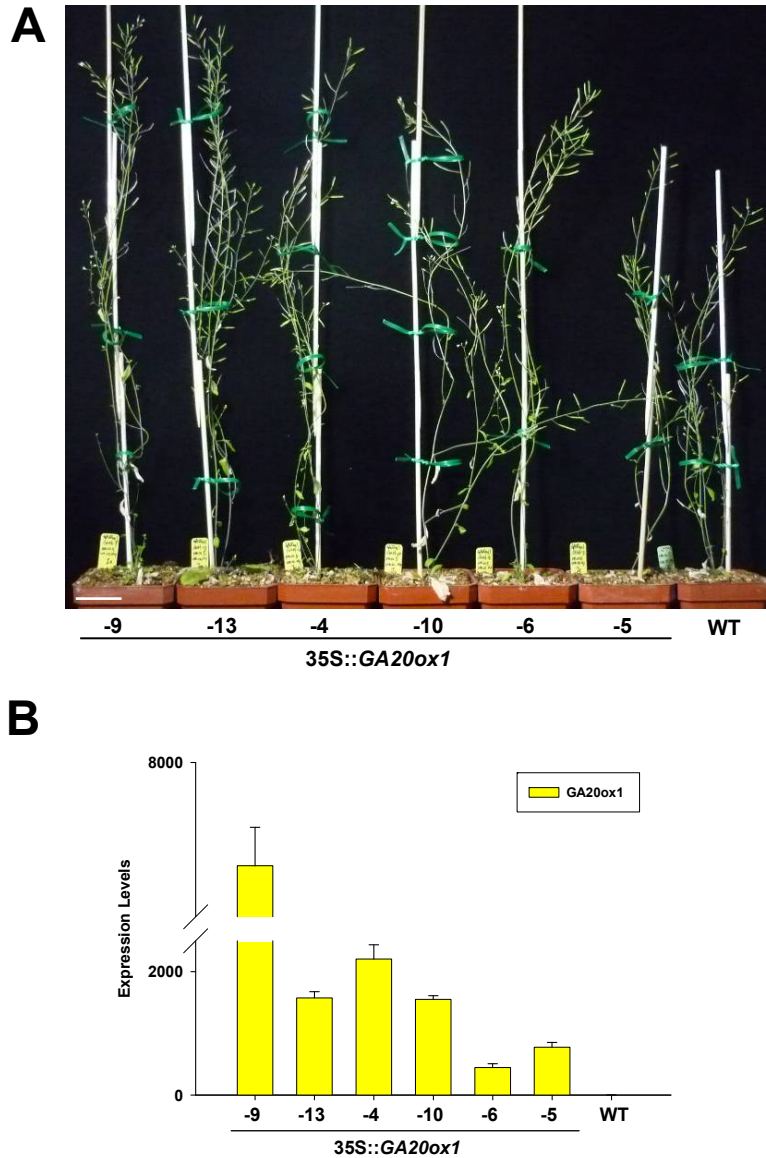

**Supplementary Figure S3.** Phenotypic analysis of the 35S::*GA20ox1* *Arabidopsis* plants. **(A)** Six 35S::*GA20ox1* *Arabidopsis* plants (lines 9, 13, 4, 10, 6 and 5) produced a longer inflorescence than the wild-type (WT) *Arabidopsis* similar to the GA-overproduction phenotype. Bar = 30 mm. **(B)** The detection of the expression level of *GA20ox1* in six 35S::*GA20ox1* *Arabidopsis* plants and one wild-type (WT) plant using real-time quantitative RT-PCR.

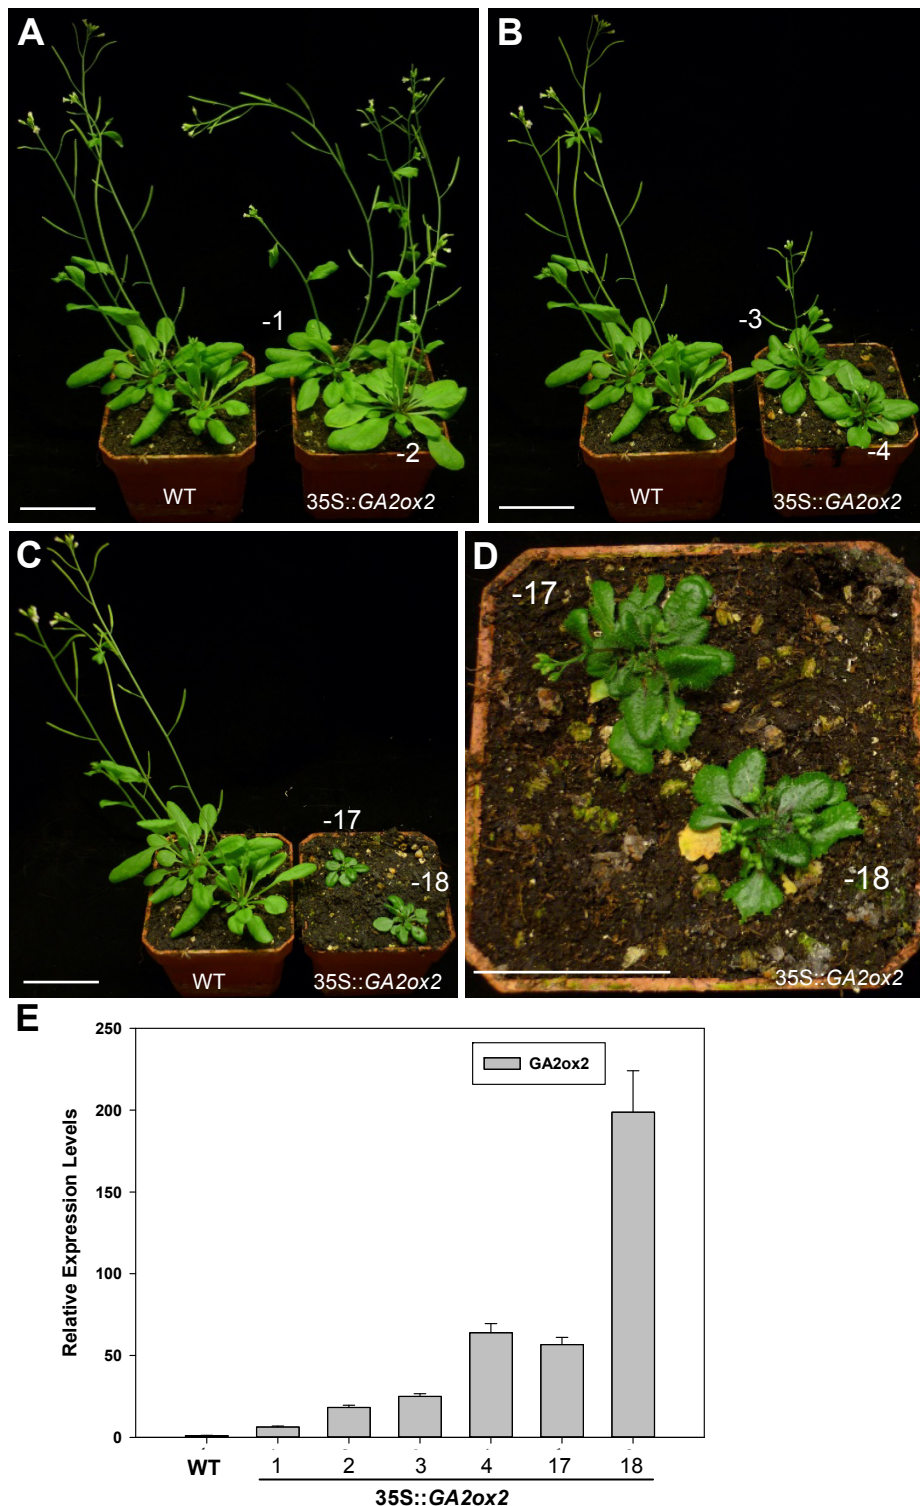

**Supplementary Figure S4.** Phenotypic analysis of the 35S::GA2ox2 *Arabidopsis* plants. (A-C) 35S::GA2ox2 *Arabidopsis* plants showed either a weak (A, lines 1, 2), medium (B, lines 3, 4) or severe (C, lines 17, 18) dwarfism phenotype compared to the wild-type (WT) *Arabidopsis*. (D) A close-up of two 35S::GA2ox2 *Arabidopsis* plants (lines 17, 18) showed severe dwarfism phenotype from (C). Bar = 30 mm in (A-D). (E) The detection of the expression for GA2ox2 in six 35S::GA2ox2 plants (lines 1, 2, 3, 4, 17 and 18) from (A-C) by real-time quantitative RT-PCR.

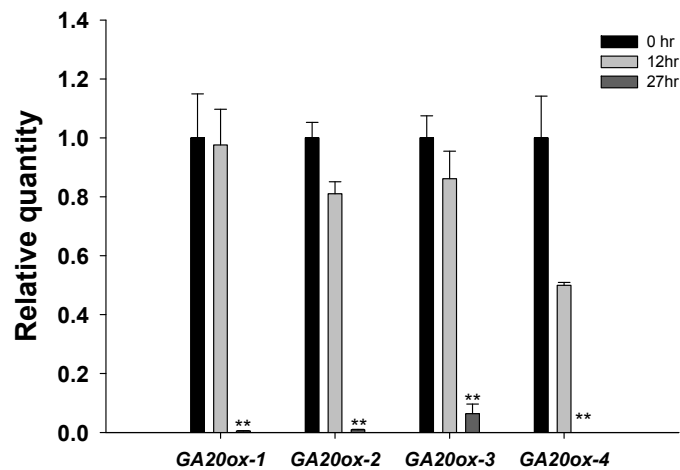

**Supplementary Figure S5.** Detection of the expression for *GA20oxs* (1-4) using real-time quantitative RT-PCR for 14-day-old wild-type *Arabidopsis* after exposure to 4°C over a period of 12 and 27 hours. The expression of *GA20oxs* (1-4) was significantly down-regulated at 27 hours after cold treatment. The transcript levels of *GA20oxs* (1-4) were determined using three replicates and normalized against *UBQ10*. The expression level for each gene in untreated wild-type plants (time 0) was set at 1. Error bars represent the standard deviation. The asterisks indicate a significant difference from the untreated wild type plants (time 0) value (\*means  $P \leq 0.05$ , \*\*means  $P \leq 0.01$ ). Statistic analysis was measured by student's T-test.

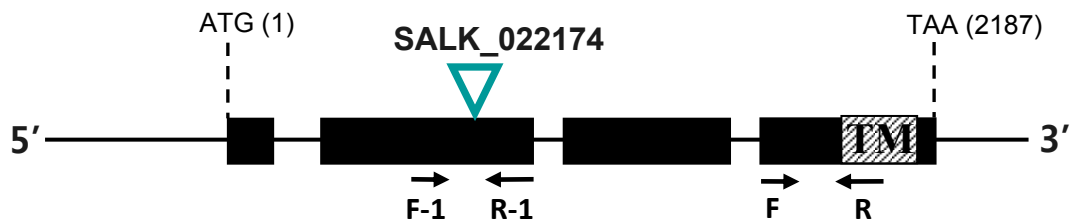

**Supplementary Figure S6.** Genomic region of *GSF*. Filled black boxes represent exons for *GSF* cDNA. Triangle indicates the location of T-DNA insertion in the second exon region in SALK\_022174 mutants. For the detection of *GSF* expression in SALK\_022174 mutant, the primers pair F-1 (*GSF* qRT for-1) and R-1 (*GSF* qRT rev-1), which located in the two sides of the T-DNA insertion, were used. For the detection of *GSF* expression in wild-type (WT) Arabidopsis, the primers pair F (*GSF* qRT for) and R (*GSF* qRT rev) were used.



**Table S1** Oligo nucleotide sequence of primers used in gene cloning and PCR analysis.

| Gene name        | Primer name                          | Primer sequence                                | Restriction site | Useing        |
|------------------|--------------------------------------|------------------------------------------------|------------------|---------------|
| <i>GSF</i>       | GSF-for                              | 5'-GGTACCGATCGGTTTGTATTGTTACGTAG-3'            | <i>KpnI</i>      | Cloning       |
|                  | GSF-rev                              | 5'-GAGCTCGGTTTCTTCTTAACCTACCAGTAG-3'           | <i>SacI</i>      | Cloning       |
|                  | GSF-for-atg ( <i>HindIII</i> )       | 5'-AAGCTTATGGCGGATTCTTCACCCGATTC-3'            | <i>HindIII</i>   | Cloning       |
|                  | fuse-GSF-rev                         | 5'-GAGCTCCTAGTCTTTCAAGAGAAGACTTC-3'            | <i>SacI</i>      | Cloning       |
|                  | GSF-TM-rev ( <i>SacI</i> )           | 5'-GAGCTCCTATCTGTTTCTAATACCCTTCTTTGCT-3'       | <i>SacI</i>      | Cloning       |
|                  | GSF qRT for                          | 5'-AGATGAACTAGGGAGATGTAAGAACC-3'               |                  | Real time PCR |
|                  | GSF qRT rev                          | 5'-GCATTAGGGATTCCATTGAGAAGC-3'                 |                  | Real time PCR |
|                  | GSF qRT for-1                        | 5'-AGATGAACTAGGGAGATGTAAGAACC-3'               |                  | Real time PCR |
|                  | GSF qRT rev-2                        | 5'-GCATTAGGGATTCCATTGAGAAGC-3'                 |                  | Real time PCR |
|                  | GSF-for-atg-Y                        | 5'-CATATGGCGGATTCTTCACCCGATTC-3'               | <i>NdeI</i>      | Cloning       |
|                  | GSF N-557 rev                        | 5'-GTCGACCTAGTCTTTCAAGAGAAGACTTCT-3'           | <i>Sall</i>      | Cloning       |
|                  | GSF N-521 rev                        | 5'-GTCGACCTAAATACCCTTCTTTGCTATGGT-3'           | <i>Sall</i>      | Cloning       |
|                  | GSF N-160 rev                        | 5'-GTCGACCTAAAGAGCATAGTACTCCTGAGG-3'           | <i>Sall</i>      | Cloning       |
|                  | GSF N-161 for                        | 5'-CATATGTATAAGTTGTTCAAGAAAAGTGGG-3'           | <i>NdeI</i>      | Cloning       |
|                  | GSF-Pro-for                          | 5'-CTGCAGCAAACTCATCTGTTTCTTTTTTG-3'            | <i>PstI</i>      | Cloning       |
| GSF-Pro-rev      | 5'-GGATCCCTACGTAACAAATCAAACCGATCC-3' | <i>XbaI</i>                                    | Cloning          |               |
| GFP-Gly-Ala      | FmGFP5L-for ( <i>KpnI</i> )          | 5'-GGTACCATGGTAGATCTGACTAGTAAAGGA-3'           | <i>KpnI</i>      | Cloning       |
|                  | FmGFP5L-rve I                        | 5'-TCCAGCACCTGCTCCGCTAGCTTTGTATAGTTCATCCA-3'   |                  | Cloning       |
|                  | FmGFP5L-rev II ( <i>HindIII</i> )    | 5'-AAGCTTTGCTCCAGCACCTGCTCCAGCACCTGCTCCGCTA-3' | <i>HindIII</i>   | Cloning       |
| <i>GAL4AD</i>    | GAL4 AD for                          | 5'-CATATGGATAAAGCGGAATTAATTC-3'                | <i>NdeI</i>      | Cloning       |
|                  | GAL4 AD rev                          | 5'-GTCGACTTACTCTTTTTTTGGGTTTGG-3'              | <i>Sall</i>      | Cloning       |
| <i>UBQ</i>       | RT-UBQ10-F3                          | 5'-CTCAGGCTCCGTGGTGGTATG-3'                    |                  | Real time PCR |
| <i>At4g05320</i> | RT-UBQ10-R3                          | 5'-GTGATAGTTTTCCAGTCAACGTC-3'                  |                  | Real time PCR |
| <i>GA2ox1</i>    | At1g78440 qRT for                    | 5'-CAAGAGCGTGAGGCATAGGG-3'                     |                  | Real time PCR |
| <i>At1g78440</i> | At1g78440 qRT rev                    | 5'-AGTCAATGAAGGTCCAGCGAAG-3'                   |                  | Real time PCR |
| <i>GA2ox2</i>    | AtGA2ox2 for <i>PstI</i>             | 5'-CTGCAGTAAAGATTTGCAAGTTAAGTGT-3'             | <i>PstI</i>      | Cloning       |
|                  | AtGA2ox2 rev <i>Sall</i>             | 5'-GTCGACAAAGGATGATAAAGATCATCATG-3'            | <i>Sall</i>      | Cloning       |
|                  | At1g30040 qRT for                    | 5'-CATTCTCTGCGTTTGTGG-3'                       |                  | Real time PCR |
|                  | At1g30040 qRT rev                    | 5'-CGTGAGTCTCAGTGTCTACATAG-3'                  |                  | Real time PCR |
| <i>GA2ox3</i>    | At2g34555 qRT for                    | 5'-TGCCTGAGAATGAACCATTACCC-3'                  |                  | Real time PCR |
|                  | At2g34555 qRT rev                    | 5'-TGTTCCATCTTTGACACAGATTTC-3'                 |                  | Real time PCR |
| <i>GA2ox4</i>    | At1g47990 qRT for                    | 5'-GCTCGGCAGTGAATTGTTACATAG-3'                 |                  | Real time PCR |
|                  | At1g47990 qRT rev                    | 5'-CACAGATTGGTCAGAAAGATTGGC-3'                 |                  | Real time PCR |
| <i>GA2ox6</i>    | At1g02400 qRT for                    | 5'-ACAGAAAGTCTAGCGAAGTGAGTG-3'                 |                  | Real time PCR |
|                  | At1g02400 qRT rev                    | 5'-CGGTGCTGGTGGATAGTGATTC-3'                   |                  | Real time PCR |
| <i>GA2ox7</i>    | At1g50960 qRT for                    | 5'-TACCAAAGCGTGAGACATAGAGTG-3'                 |                  | Real time PCR |
|                  | At1g50960 qRT rev                    | 5'-CGAGATAAGGACATACGAAGAAAGC-3'                |                  | Real time PCR |
| <i>GA2ox8</i>    | At4g21200 qRT for                    | 5'-ATCCACCTTGCCCAAACCATC-3'                    |                  | Real time PCR |

|                  |                         |                                      |             |               |
|------------------|-------------------------|--------------------------------------|-------------|---------------|
| <i>At4g21200</i> | At4g21200 qRT rev       | 5'-AACAGCGATCCATCTATTGTCTTTG-3'      |             | Real time PCR |
| <i>GA20ox1</i>   | At4g25420 (GA20ox1)-for | 5'-GGTACCCGCAATACTACTCACTTTACT-3'    | <i>KpnI</i> | Cloning       |
| <i>At4g25420</i> | At4g25420 (GA20ox1)-rev | 5'-GAGCTCACTAGTAACAAACAAGACAAGACA-3' | <i>SacI</i> | Cloning       |
|                  | At4g25420 qRT for       | 5'-AGCCAATATCCCAAACCAATTCATC-3'      |             | Real time PCR |
|                  | At4g25420 qRT rev       | 5'-TCGGAGAGAGGCATATCAAAGAAG-3'       |             | Real time PCR |
| <i>GA20ox2</i>   | At5g51810 qRT for       | 5'-CGGCAGAGAAAGAACACGAAC-3'          |             | Real time PCR |
| <i>At5g51810</i> | At5g51810 qRT rev       | 5'-AGAGAAGGGTTAAAGATTAGTGGAG-3'      |             | Real time PCR |
| <i>GA20ox3</i>   | At5g07200 qRT for       | 5'-GCCTCTTGTCTCGTGCCTATC-3'          |             | Real time PCR |
| <i>At5g07200</i> | At5g07200 qRT rev       | 5'-CACTTCCTCTGAGCCTTCTGC-3'          |             | Real time PCR |
| <i>GA20ox4</i>   | At1g60980 qRT for       | 5'-TCAACCAGACCATATACCTCAAGAG-3'      |             | Real time PCR |
| <i>At1g60980</i> | At1g60980 qRT rev       | 5'-TTCAGCCTCCGAGACCAATAATG-3'        |             | Real time PCR |
